# Supplementary material
Source: MDPI journal article supplement (https://www.mdpi.com/2571-8789/7/4/81)
Supplement: s1 [file s1 › soilsystems-2540554-supplementary.pdf]

Table S1 - Results of physicochemical parameters of soil samples.

| Parameters                         | Values |
|------------------------------------|--------|
| pH                                 | 7.35   |
| Conductivity (dScm <sup>-1</sup> ) | 1.57   |
| Organic Carbon (%)                 | 1.03   |
| Organic Matter (%)                 | 1.77   |
| Total Kjeldahl Nitrogen (TKN %)    | 0.05   |
| Proteins (%)                       | 0.319  |
| Fluoride (ppm)                     | 0.34   |
| Chloride (ppm)                     | 17.33  |
| Nitrite (ppm)                      | 0.36   |
| Bromide (ppm)                      | 0.96   |
| Nitrate (ppm)                      | 8.51   |
| Phosphate (ppm)                    | 3.25   |
| Sulphate (ppm)                     | 3.85   |
| Sodium (ppm)                       | 9.50   |
| Ammonium (ppm)                     | 0.12   |
| Potassium (ppm)                    | 2.43   |
| Magnesium (ppm)                    | 6.25   |
| Calcium (ppm)                      | 23.38  |

pH and EC measurement of samples were carried out at room temperature upon reaching the laboratory. pH was measured by Systronics digital pH meter 803, and EC was measured by digital conductivity meter LT-16 model. OC and OM were determined by Wet digestion method (Walky and Black). Anions were measured by a Metrohm 883 basic IC plus system and cations were determined by Metrohm 940 professional IC vario system.
